# Supplementary material
Source: PubMed Central journal article supplement (PMC6454578)
Supplement: kxx041_supp.pdf [file kxx041_supp.pdf]

## Supplementary Appendix for

“Robust Distributed Lag Models via Data Adaptive Shrinkage”

Yin-Hsiu Chen<sup>1</sup>, Bhramar Mukherjee<sup>1</sup>

Sara D. Adar<sup>2</sup>, Veronica J. Berrocal<sup>1</sup>, Brent A. Coull<sup>3</sup>

<sup>1</sup>Department of Biostatistics, University of Michigan

<sup>2</sup>Department of Epidemiology, University of Michigan

<sup>3</sup>Department of Biostatistics, Harvard University

### A.1 Connection Between $\mathbf{C}$ and $\mathbf{R}$ beyond Polynomial DLM

Denote

$\mathbf{C}$ : a  $(L + 1) \times p$  transformation matrix

$\mathbf{R}$ : a  $(L + 1 - p) \times (L + 1)$  constraint matrix

$\mathbf{C}_e$ : a  $(L + 1) \times (L + 1)$  matrix  $[\mathbf{C} \mathbf{0}_{(L+1) \times (L+1-p)}]$  where  $\mathbf{0}_{(L+1) \times (L+1-p)}$  is a  $(L + 1) \times (L + 1 - p)$  zero matrix

$\mathbf{R}_e$ : a  $(L + 1) \times (L + 1)$  matrix  $\begin{bmatrix} \mathbf{R} \\ \mathbf{0}_{p \times (L+1)} \end{bmatrix}$  where  $\mathbf{0}_{p \times (L+1)}$  is a  $p \times (L + 1)$  zero matrix

(1)  $\mathbf{R} \rightarrow \mathbf{C}$

The  $p$  basis functions corresponding to the  $p$  columns of  $\mathbf{C}$  span the solution space of  $\mathbf{R}\boldsymbol{\beta} = 0$  (or  $\mathbf{R}_e\boldsymbol{\beta} = 0$ ).  $\mathbf{C}$  can be obtained by applying SVD on  $\mathbf{R}_e$  (i.e.  $\mathbf{R}_e = \mathbf{U}_R \mathbf{D}_R \mathbf{V}_R^T$ ). The last  $p$  columns of  $\mathbf{V}_R$  is one choice of  $\mathbf{C}$ .

(2)  $\mathbf{C} \rightarrow \mathbf{R}$

$\boldsymbol{\beta} = \mathbf{C}\boldsymbol{\eta}$  and  $\mathbf{R}\boldsymbol{\beta} = 0$  so we have  $\mathbf{R}\mathbf{C}\boldsymbol{\eta} = 0$ . Deriving  $\mathbf{R}$  from  $\mathbf{C}$  is equivalent of solving  $\mathbf{C}^T \mathbf{R}^T = 0$  (or  $\mathbf{C}_e^T \mathbf{R}^T = 0$ ).  $\mathbf{R}$  can be obtained by applying SVD on  $\mathbf{C}_e^T$  (i.e.  $\mathbf{C}_e^T = \mathbf{U}_C \mathbf{D}_C \mathbf{V}_C^T$ ). The last  $(L + 1 - p)$  rows of  $\mathbf{V}_C^T$  is one choice of  $\mathbf{R}$ .

**Remark:** DLM solution is invariant to row operations on  $\mathbf{R}$ . For example, consider a piecewise linear distributed lag function with  $L = 6$  and only internal knot at 3. With basis functions 1,  $\ell$ , and  $(\ell - 3)_+$ ,  $\mathbf{C}$  is given by

$$\mathbf{C} = \begin{bmatrix} 1 & 0 & 0 \\ 1 & 1 & 0 \\ 1 & 2 & 0 \\ 1 & 3 & 0 \\ 1 & 4 & 1 \\ 1 & 5 & 2 \\ 1 & 6 & 3 \end{bmatrix}.$$

Following the above procedure,  $\mathbf{R}$  can be obtained as

$$\mathbf{R} = \begin{bmatrix} 0.000 & -0.346 & 0.693 & -0.030 & -0.255 & -0.439 & 0.377 \\ 0.000 & -0.218 & 0.436 & -0.290 & -0.238 & 0.691 & -0.381 \\ 0.000 & -0.090 & 0.179 & -0.549 & 0.779 & -0.180 & -0.139 \\ -0.560 & 0.727 & 0.226 & -0.275 & -0.157 & -0.039 & 0.079 \end{bmatrix}.$$

Through row operations, we can obtain

$$\mathbf{R} = \begin{bmatrix} 1 & -2 & 1 & 0 & 0 & 0 & 0 \\ 0 & 1 & -2 & 1 & 0 & 0 & 0 \\ 0 & 0 & 0 & 1 & -2 & 1 & 0 \\ 0 & 0 & 0 & 0 & 1 & -2 & 1 \end{bmatrix}$$

as suggested. The solution of  $\mathbf{R}\boldsymbol{\beta} = \mathbf{0}$  is a piecewise linear function with internal knot at 3.

## A.2 Asymptotic Results for the Empirical Bayes estimator

We first derive the variance-covariance expression of  $\hat{\boldsymbol{\psi}} = \hat{\boldsymbol{\beta}}_{UDLM} - \hat{\boldsymbol{\beta}}_{CDLM}$  and then obtain the asymptotic theory of  $\hat{\boldsymbol{\beta}}_{EB1}$ . Let  $S_U^{(t)}(\boldsymbol{\beta})$  denote the first-order derivative of the unconstrained DLM likelihood for time  $t$  (i.e.  $(y_t - e^{-\mathbf{x}_t^T \boldsymbol{\beta}}) \mathbf{X}_t$ )  $S_C^{(t)}(\boldsymbol{\theta})$  denote the first-order derivative of the constrained DLM likelihood for time  $t$  (i.e.  $(y_t - e^{-\mathbf{z}_t^T \boldsymbol{\theta}}) \mathbf{Z}_t$ ), and let  $H_U(\boldsymbol{\beta})$  and  $H_C(\boldsymbol{\theta})$  denote the Hessian matrices from the two models, respectively. Let  $\boldsymbol{\beta}_0$  denote the true vector of lagged coefficients. By Taylor expansion,

$$\begin{aligned} \ell'(\hat{\boldsymbol{\beta}}_{UDLM}) &= \ell'(\boldsymbol{\beta}_0) + \ell''(\boldsymbol{\beta}_0)(\hat{\boldsymbol{\beta}}_{UDLM} - \boldsymbol{\beta}_0) + o_p(|\hat{\boldsymbol{\beta}}_{UDLM} - \boldsymbol{\beta}_0|) \\ \Rightarrow \hat{\boldsymbol{\beta}}_{UDLM} - \boldsymbol{\beta}_0 &= [-\ell''(\boldsymbol{\beta}_0) + o_p(1)]^{-1} \ell'(\boldsymbol{\beta}_0) \\ \Rightarrow \text{Cov}(\hat{\boldsymbol{\beta}}_{UDLM}) &= [-\ell''(\boldsymbol{\beta}_0)]^{-1} \text{Cov}(\ell'(\boldsymbol{\beta}_0)) [-\ell''(\boldsymbol{\beta}_0)]^{-1} + o_p(1) \\ \Rightarrow [-\ell''(\boldsymbol{\beta}_0)]^{-1} \text{Cov}(\ell'(\boldsymbol{\beta}_0)) [-\ell''(\boldsymbol{\beta}_0)]^{-1} &\xrightarrow{P} \text{Cov}(\hat{\boldsymbol{\beta}}_{UDLM}) \end{aligned}$$

Since  $\hat{\boldsymbol{\beta}}_{UDLM} \rightarrow \boldsymbol{\beta}_0$ ,  $-H_U^{-1}(\hat{\boldsymbol{\beta}}_{UDLM})^{-1} \xrightarrow{P} [-\ell''(\boldsymbol{\beta}_0)]^{-1}$ . Also,  $\text{Cov}(\ell'(\boldsymbol{\beta}_0))$  can be consistently estimated by empirical variance  $\sum_{t=1}^T S_U^{(t)}(\hat{\boldsymbol{\beta}}_{UDLM}) S_U^{(t)}(\hat{\boldsymbol{\beta}}_{UDLM})^T$ . So,

$$\text{Cov}(\hat{\boldsymbol{\beta}}) = H_U^{-1}(\hat{\boldsymbol{\beta}}) \left[ \sum_{t=1}^T S_U^{(t)}(\hat{\boldsymbol{\beta}}) S_U^{(t)}(\hat{\boldsymbol{\beta}})^T \right] H_U^{-1}(\hat{\boldsymbol{\beta}})$$

Similarly,

$$\begin{aligned} \text{Cov}(\hat{\boldsymbol{\theta}}) &= H_C^{-1}(\hat{\boldsymbol{\theta}}) \left[ \sum_{t=1}^T S_C^{(t)}(\hat{\boldsymbol{\theta}}) S_C^{(t)}(\hat{\boldsymbol{\theta}})^T \right] H_C^{-1}(\hat{\boldsymbol{\theta}}) \\ \text{Cov}(\hat{\boldsymbol{\beta}}_{UDLM}, \hat{\boldsymbol{\theta}}) &= H_U^{-1}(\hat{\boldsymbol{\beta}}_{UDLM}) \left[ \sum_{t=1}^T S_U^{(t)}(\hat{\boldsymbol{\beta}}_{UDLM}) S_C^{(t)}(\hat{\boldsymbol{\theta}})^T \right] H_C^{-1}(\hat{\boldsymbol{\theta}}) \end{aligned}$$

Therefore,

$$\begin{aligned}
\text{Cov}(\hat{\boldsymbol{\psi}}) &= \text{Cov}(\hat{\boldsymbol{\beta}}_{UDLM} - \hat{\boldsymbol{\beta}}_{CDLM}) \\
&= \text{Cov}(\hat{\boldsymbol{\beta}}_{UDLM} - \mathbf{C}\hat{\boldsymbol{\theta}}) \\
&= \text{Cov}(\hat{\boldsymbol{\beta}}_{UDLM}) - 2\text{Cov}(\hat{\boldsymbol{\beta}}_{UDLM}, \hat{\boldsymbol{\theta}})\mathbf{C}^T + \mathbf{C}\text{Cov}(\hat{\boldsymbol{\theta}})\mathbf{C}^T \\
&= H_U^{-1}(\hat{\boldsymbol{\beta}}_{UDLM})\left[\sum_{t=1}^T S_U^{(t)}(\hat{\boldsymbol{\beta}}_{UDLM})S_U^{(t)}(\hat{\boldsymbol{\beta}}_{UDLM})^T\right]H_U^{-1}(\hat{\boldsymbol{\beta}}_{UDLM}) \\
&\quad - 2H_U^{-1}(\hat{\boldsymbol{\beta}}_{UDLM})\left[\sum_{t=1}^T S_U^{(t)}(\hat{\boldsymbol{\beta}}_{UDLM})S_C^{(t)}(\hat{\boldsymbol{\theta}})^T\right]H_C^{-1}(\hat{\boldsymbol{\theta}})\mathbf{C}^T \\
&\quad + \mathbf{C}H_C^{-1}(\hat{\boldsymbol{\theta}})\left[\sum_{t=1}^T S_C^{(t)}(\hat{\boldsymbol{\theta}})S_C^{(t)}(\hat{\boldsymbol{\theta}})^T\right]H_C^{-1}(\hat{\boldsymbol{\theta}})\mathbf{C}^T
\end{aligned}$$

Let  $\boldsymbol{\beta}_{CDLM}$ ,  $\boldsymbol{\beta}_{EB1}$ , and  $\boldsymbol{\psi}$  be the asymptotic limit of constrained DLM estimator, EB1 estimator, and bias, respectively. We have

$$\boldsymbol{\beta}_{EB1} = \boldsymbol{\beta}_0 + \mathbf{K}\boldsymbol{\psi}$$

where  $\mathbf{K} = (\mathbf{V} \circ \mathbf{I}_{L+1})[(\mathbf{V} + \boldsymbol{\psi}\boldsymbol{\psi}^T) \circ \mathbf{I}_{L+1}]^{-1}$ . When  $\boldsymbol{\beta}_0 \neq \boldsymbol{\beta}_{CDLM}$  ( $\boldsymbol{\psi} \neq \mathbf{0}$ ), we can use first-order Taylor expansion of  $\hat{\boldsymbol{\beta}}_{EB1}$  at  $(\boldsymbol{\beta}_0^T, \boldsymbol{\beta}_{CDLM}^T)^T$  and the fact that  $\mathbf{V} = O_p(N^{-1})$  to obtain

$$\sqrt{N}(\hat{\boldsymbol{\beta}}_{EB1} - \boldsymbol{\beta}_{EB1}) = \mathbf{G} \times \sqrt{N}[(\hat{\boldsymbol{\beta}}_{UDLM}^T, \hat{\boldsymbol{\beta}}_{CDLM}^T)^T - (\boldsymbol{\beta}_0^T, \boldsymbol{\beta}_{CDLM}^T)^T] + o_p(1)$$

where

$$\mathbf{G} = [\text{diag}\left\{\frac{v_j(v_j - \psi_j^2)}{(v_j + \psi_j^2)^2}\right\}, \mathbf{I}_{L+1} - \text{diag}\left\{\frac{v_j(v_j - \psi_j^2)}{(v_j + \psi_j^2)^2}\right\}]$$

where  $v_j$ s are the diagonal elements of  $\mathbf{V}$  and  $\psi_j$ s are the elements of  $\boldsymbol{\psi}$ . Thus,  $\hat{\boldsymbol{\beta}}_{EB1}$  is  $\sqrt{N}$ -consistent and asymptotically normal when  $\boldsymbol{\beta}_0 \neq \boldsymbol{\beta}_{CDLM}$ . Let  $\hat{\boldsymbol{\Sigma}}$  denote the estimated variance-covariance matrix of  $(\hat{\boldsymbol{\beta}}_{UDLM}^T, \hat{\boldsymbol{\beta}}_{CDLM}^T)^T$ . With plug-in estimate of  $\mathbf{G}$ , the asymptotic variance of  $\hat{\boldsymbol{\beta}}_{EB1}$  can be estimated as  $\hat{\mathbf{G}}\hat{\boldsymbol{\Sigma}}\hat{\mathbf{G}}^T$ .

### A.3 Equivalence of $(p-1)$ -degree Polynomial DLM Estimator and GRR/HB Shrinkage Target Corresponding to $\mathbf{R}_{p-1}$

The general form of  $(p-1)$ -degree polynomial distributed lag function is  $\beta(\ell) = \sum_{i=0}^{p-1} a_i \ell^i = \mathbf{C}\boldsymbol{\theta}$  for  $\ell = 0, \dots, L$  where  $\mathbf{C}$  is a  $(L+1) \times p$  transformation matrix with element  $(\ell+1, j)$  equal to  $\ell^{(j-1)}$  and  $\boldsymbol{\theta} = (a_1, \dots, a_p)^T$ . Let  $\mathbf{R}_{p-1}$  be the  $(p-1)$ -degree polynomial constraint matrix. We first show that  $\mathbf{R}_{p-1}\mathbf{C} = \mathbf{0}$ .

The corresponding constraints constructed in  $\mathbf{R}_{p-1}$  are  $\sum_{j=0}^p (-1)^j \binom{p}{j} \beta(\ell+j) = 0$  for  $\ell = 0, \dots, L-p$ . Showing  $\mathbf{R}_{p-1}\mathbf{C} = \mathbf{0}$  is the same as showing  $\sum_{j=0}^p (-1)^j \binom{p}{j} [\sum_{i=1}^p a_i (\ell +$

$j)^{i-1}] = 0$  for  $\ell = 0, \dots, L - p$ .

$$\begin{aligned} & \sum_{j=0}^p (-1)^j \binom{p}{j} \left[ \sum_{i=1}^p a_i (\ell + j)^{i-1} \right] \\ &= \sum_{i=1}^p \sum_{j=0}^p (-1)^j \binom{p}{j} a_i (\ell + j)^{i-1} \\ &= \sum_{i=1}^p a_i \left[ \sum_{j=0}^p (-1)^j \binom{p}{j} (\ell + j)^{i-1} \right] \end{aligned}$$

It is sufficient to show that  $\sum_{j=0}^p (-1)^j \binom{p}{j} (\ell + j)^{i-1} = 0$  for  $\ell = 0, \dots, L - p$  and  $1 \leq i \leq p$ . It is well-known that each polynomial can be uniquely expressed as a linear combination of binomial coefficients.  $\sum_{j=0}^p (-1)^j \binom{p}{j} (\ell + j)^{i-1} = 0$  corresponds to the binomial coefficient involved  $(p - 1)$ -degree term of the characteristic polynomial  $(\ell + j)^{i-1}$ . We know that  $i$  is at most  $p$  so the coefficients of all the terms of degree larger than  $p - 1$  must be zero so we have  $\sum_{j=0}^p (-1)^j \binom{p}{j} (\ell + j)^{i-1} = 0$  for  $\ell = 0, \dots, L - p$  and  $1 \leq i \leq p$ . Therefore,  $\mathbf{R}_{p-1} \mathbf{C} = \mathbf{0}$ .

The shrinkage target of GRR/HB estimator corresponding to  $\mathbf{R}_{p-1}$  is the maximizer of likelihood function in (1) of main text subject to the constraint  $\mathbf{R}_{p-1} \boldsymbol{\beta} = \mathbf{0}$ . Let  $\hat{\boldsymbol{\beta}}$  denote the GRR/HB estimator. Since  $\hat{\boldsymbol{\beta}}$  conforms to the constraint, we have  $\mathbf{R}_{p-1} \hat{\boldsymbol{\beta}} = \mathbf{0}$  and  $\hat{\boldsymbol{\beta}}$  is an element in the kernel of  $\mathbf{R}_{p-1}$ . From above, we have  $\mathbf{R}_{p-1} \mathbf{C} = \mathbf{0}$  and we know that the  $p$  columns of  $\mathbf{C}$  are linearly independent. Thus, the kernel of  $\mathbf{R}_{p-1}$  is spanned by the  $p$  columns of  $\mathbf{C}$ . Subsequently, every element in the kernel can be expressed as  $\mathbf{C}\boldsymbol{\theta}$  so  $\hat{\boldsymbol{\beta}}$  must be in the form of  $\mathbf{C}\boldsymbol{\theta}$ . Therefore, the maximizing the likelihood function in (1) in terms of  $\boldsymbol{\beta}$  subject to the constraint  $\mathbf{R}_{p-1} \boldsymbol{\beta} = \mathbf{0}$  is equivalent to maximizing the likelihood function in (2) in terms of  $\boldsymbol{\theta}$  without any constraint. We then conclude that  $(p - 1)$ -degree polynomial DLM estimator and GRR/HB shrinkage target corresponding to  $\mathbf{R}_{p-1}$  are equivalent.

## A.4 Conditional Distributions of HB Estimator and Two-stage Shrinkage Estimator

The full conditional distributions of  $\sigma_\pi^2$  and  $\boldsymbol{\beta}$  for HB estimator are given by

$$\begin{aligned} f(\sigma_\pi^2 | \boldsymbol{\beta}, \mathbf{Y}) &\propto IG(a_\pi + M/2, b_\pi + \boldsymbol{\beta}^T \mathbf{R}^T \mathbf{R} \boldsymbol{\beta} / 2) \\ f(\boldsymbol{\beta} | \sigma_\pi^2, \mathbf{Y}) &\propto \prod_{t=1}^T [\exp(y_t \mathbf{X}_t^T \boldsymbol{\beta} - e^{\mathbf{X}_t^T \boldsymbol{\beta}})] \cdot \exp\left(-\frac{\boldsymbol{\beta}^T \mathbf{R}^T \mathbf{R} \boldsymbol{\beta}}{2\sigma_\pi^2}\right). \end{aligned}$$

For two-stage shrinkage approach, if we let  $\boldsymbol{\omega} = (\omega_1, \omega_2)^T$  have a discrete uniform prior distribution, the full conditional distributions of  $\boldsymbol{\beta}$ ,  $\sigma^2$ , and  $\boldsymbol{\omega}$  are given by:

$$\begin{aligned} f(\boldsymbol{\beta}|\hat{\boldsymbol{\beta}}_{EB}, \boldsymbol{\omega}, \sigma^2) &\sim N([1/\sigma^2\boldsymbol{\Omega}(\boldsymbol{\omega})^{-1} + (\mathbf{G}\boldsymbol{\Sigma}\mathbf{G}^T)^{-1}]^{-1}(\mathbf{G}\boldsymbol{\Sigma}\mathbf{G}^T)^{-1}\hat{\boldsymbol{\beta}}_{EB}, [1/\sigma^2\boldsymbol{\Omega}(\boldsymbol{\omega})^{-1} + (\mathbf{G}\boldsymbol{\Sigma}\mathbf{G})^{-1}]^{-1}) \\ p(\boldsymbol{\omega}|\hat{\boldsymbol{\beta}}_{EB}, \boldsymbol{\beta}, \sigma^2) &= \frac{|\boldsymbol{\Omega}(\boldsymbol{\omega})|^{-1/2}\exp[-\frac{1}{2\sigma^2}\boldsymbol{\beta}^T\boldsymbol{\Omega}(\boldsymbol{\omega})^{-1}\boldsymbol{\beta}]}{\sum_{\boldsymbol{\omega}^*} |\boldsymbol{\Omega}(\boldsymbol{\omega}^*)|^{-1/2}\exp[-\frac{1}{2\sigma^2}\boldsymbol{\beta}^T\boldsymbol{\Omega}(\boldsymbol{\omega}^*)^{-1}\boldsymbol{\beta}]} \\ f(\sigma^2|\hat{\boldsymbol{\beta}}_{EB}, \boldsymbol{\beta}, \boldsymbol{\omega}) &\sim IG(a_0 + (L + 1)/2, b_0 + \boldsymbol{\beta}^T\boldsymbol{\Omega}(\boldsymbol{\omega})^{-1}\boldsymbol{\beta}/2). \end{aligned}$$

## A.5 Analytical Results for the GRR Estimator

GRR estimator  $\hat{\boldsymbol{\beta}}_{GRR}$  is given by

$$\hat{\boldsymbol{\beta}}_{GRR} = \arg \min_{\boldsymbol{\beta}} \left[ -\sum_{t=1}^T [y_t \boldsymbol{\beta}^T \mathbf{X}_t - e^{\boldsymbol{\beta}^T \mathbf{X}_t} - \log(y_t!)] + \lambda \boldsymbol{\beta}^T \mathbf{R}^T \mathbf{R} \boldsymbol{\beta} \right]$$

and its asymptotic MSE  $E[(\hat{\boldsymbol{\beta}}_{GRR} - \boldsymbol{\beta})^T (\hat{\boldsymbol{\beta}}_{GRR} - \boldsymbol{\beta})]$  can be decomposed into  $f_1(\lambda) + f_2(\lambda)$  where

$$f_1(\lambda) = E[(\hat{\boldsymbol{\beta}}_{UDLM} - \boldsymbol{\beta})^T \mathbf{H}^T \mathbf{H} (\hat{\boldsymbol{\beta}}_{UDLM} - \boldsymbol{\beta})] = \text{trace}[(\mathbf{X}^T \mathbf{W} \mathbf{X})(\mathbf{X}^T \mathbf{W} \mathbf{X} + \lambda \mathbf{R}^T \mathbf{R})^{-2}]$$

$$f_2(\lambda) = (\mathbf{H}\boldsymbol{\beta} - \boldsymbol{\beta})^T (\mathbf{H}\boldsymbol{\beta} - \boldsymbol{\beta}) = \lambda^2 \boldsymbol{\beta}^T (\mathbf{R}^T \mathbf{R})(\mathbf{X}^T \mathbf{W} \mathbf{X} + \lambda \mathbf{R}^T \mathbf{R})^{-2} (\mathbf{R}^T \mathbf{R}) \boldsymbol{\beta}.$$

We first show that  $f_1(\lambda)$  is monotonic decreasing and  $f_2(\lambda)$  is monotonic increasing and then we show that  $f_1(\lambda) + f_2(\lambda)$  is convex.

$$\begin{aligned} &df_1(\lambda) \\ &= d\text{trace}[(\mathbf{X}^T \hat{\mathbf{W}} \mathbf{X})(\mathbf{X}^T \hat{\mathbf{W}} \mathbf{X} + \lambda \mathbf{R}^T \mathbf{R})^{-2}] \\ &= \text{trace}[2(\mathbf{X}^T \hat{\mathbf{W}} \mathbf{X} + \lambda \mathbf{R}^T \mathbf{R})^{-1} (\mathbf{X}^T \hat{\mathbf{W}} \mathbf{X}) d(\mathbf{X}^T \hat{\mathbf{W}} \mathbf{X} + \lambda \mathbf{R}^T \mathbf{R})^{-1}] \\ &= \text{trace}\{-2(\mathbf{X}^T \hat{\mathbf{W}} \mathbf{X} + \lambda \mathbf{R}^T \mathbf{R})^{-1} (\mathbf{X}^T \hat{\mathbf{W}} \mathbf{X})(\mathbf{X}^T \hat{\mathbf{W}} \mathbf{X} + \lambda \mathbf{R}^T \mathbf{R})^{-1} [d(\mathbf{X}^T \hat{\mathbf{W}} \mathbf{X} + \lambda \mathbf{R}^T \mathbf{R})] \\ &\quad (\mathbf{X}^T \hat{\mathbf{W}} \mathbf{X})(\mathbf{X}^T \hat{\mathbf{W}} \mathbf{X} + \lambda \mathbf{R}^T \mathbf{R})^{-1}\} \\ &= \text{trace}[-2\mathbf{R}^T \mathbf{R} (\mathbf{X}^T \hat{\mathbf{W}} \mathbf{X})(\mathbf{X}^T \hat{\mathbf{W}} \mathbf{X} + \lambda \mathbf{R}^T \mathbf{R})^{-3}] d\lambda \end{aligned}$$

Since  $\mathbf{X}^T \hat{\mathbf{W}} \mathbf{X}$  and  $\mathbf{R}^T \mathbf{R}$  are positive definite and  $\lambda > 0$ ,  $\mathbf{X}^T \hat{\mathbf{W}} \mathbf{X} + \lambda \mathbf{R}^T \mathbf{R}$  is positive definite (Weyl's inequality). It follows that  $2\mathbf{R}^T \mathbf{R} (\mathbf{X}^T \hat{\mathbf{W}} \mathbf{X})(\mathbf{X}^T \hat{\mathbf{W}} \mathbf{X} + \lambda \mathbf{R}^T \mathbf{R})^{-3}$  is positive definite and  $\text{trace}[-2\mathbf{R}^T \mathbf{R} (\mathbf{X}^T \hat{\mathbf{W}} \mathbf{X})(\mathbf{X}^T \hat{\mathbf{W}} \mathbf{X} + \lambda \mathbf{R}^T \mathbf{R})^{-3}] < 0$ . Therefore, we have shown that  $f_1(\lambda)$  is monotonic decreasing ( $f_1'(\lambda) < 0 \forall \lambda > 0$ ).

Assume  $\lambda_2 > \lambda_1 > 0$ ,

$$\begin{aligned}
& f_2(\lambda_2) - f_2(\lambda_1) \\
&= \lambda_2^2 \beta^T (\mathbf{R}^T \mathbf{R}) (\mathbf{X}^T \hat{\mathbf{W}} \mathbf{X} + \lambda_2 \mathbf{R}^T \mathbf{R})^{-2} (\mathbf{R}^T \mathbf{R}) \beta - \lambda_1^2 \beta^T (\mathbf{R}^T \mathbf{R}) (\mathbf{X}^T \hat{\mathbf{W}} \mathbf{X} + \lambda_1 \mathbf{R}^T \mathbf{R})^{-2} (\mathbf{R}^T \mathbf{R}) \beta \\
&= \beta^T (\mathbf{R}^T \mathbf{R}) \left[ \left( \frac{1}{\lambda_2} \mathbf{X}^T \hat{\mathbf{W}} \mathbf{X} + \mathbf{R}^T \mathbf{R} \right)^{-2} - \left( \frac{1}{\lambda_1} \mathbf{X}^T \hat{\mathbf{W}} \mathbf{X} + \mathbf{R}^T \mathbf{R} \right)^{-2} \right] (\mathbf{R}^T \mathbf{R}) \beta \\
&= \beta^T (\mathbf{R}^T \mathbf{R}) \left( \frac{1}{\lambda_2} \mathbf{X}^T \hat{\mathbf{W}} \mathbf{X} + \mathbf{R}^T \mathbf{R} \right)^{-2} \left[ \left( \frac{1}{\lambda_1} \mathbf{X}^T \hat{\mathbf{W}} \mathbf{X} + \mathbf{R}^T \mathbf{R} \right)^2 - \left( \frac{1}{\lambda_2} \mathbf{X}^T \hat{\mathbf{W}} \mathbf{X} + \mathbf{R}^T \mathbf{R} \right)^2 \right] \\
&\quad \left( \frac{1}{\lambda_1} \mathbf{X}^T \hat{\mathbf{W}} \mathbf{X} + \mathbf{R}^T \mathbf{R} \right)^{-2} (\mathbf{R}^T \mathbf{R}) \beta \\
&= \beta^T (\mathbf{R}^T \mathbf{R}) \left( \frac{1}{\lambda_2} \mathbf{X}^T \hat{\mathbf{W}} \mathbf{X} + \mathbf{R}^T \mathbf{R} \right)^{-2} \left[ \left( \frac{1}{\lambda_1^2} - \frac{1}{\lambda_2^2} \right) (\mathbf{X}^T \hat{\mathbf{W}} \mathbf{X})^2 + \left( \frac{1}{\lambda_1} - \frac{1}{\lambda_2} \right) (\mathbf{X}^T \hat{\mathbf{W}} \mathbf{X}) (\mathbf{R}^T \mathbf{R}) \right] \\
&\quad \left( \frac{1}{\lambda_1} \mathbf{X}^T \hat{\mathbf{W}} \mathbf{X} + \mathbf{R}^T \mathbf{R} \right)^{-2} (\mathbf{R}^T \mathbf{R}) \beta \\
&= \text{trace} \left\{ \beta \beta^T (\mathbf{R}^T \mathbf{R})^2 \left( \frac{1}{\lambda_2} \mathbf{X}^T \hat{\mathbf{W}} \mathbf{X} + \mathbf{R}^T \mathbf{R} \right)^{-2} \left[ \left( \frac{1}{\lambda_1^2} - \frac{1}{\lambda_2^2} \right) (\mathbf{X}^T \hat{\mathbf{W}} \mathbf{X})^2 + \left( \frac{1}{\lambda_1} - \frac{1}{\lambda_2} \right) (\mathbf{X}^T \hat{\mathbf{W}} \mathbf{X}) (\mathbf{R}^T \mathbf{R}) \right] \right. \\
&\quad \left. \left( \frac{1}{\lambda_1} \mathbf{X}^T \hat{\mathbf{W}} \mathbf{X} + \mathbf{R}^T \mathbf{R} \right)^{-2} \right\} \\
&= \text{trace}(\mathbf{A}) \\
&= \sum_{\ell=1}^{L+1} \alpha_\ell
\end{aligned}$$

where  $\gamma_\ell$  is the  $\ell^{\text{th}}$  eigenvalue of  $\mathbf{B}$ . Since  $\beta \beta^T$ ,  $\mathbf{X}^T \hat{\mathbf{W}} \mathbf{X}$ , and  $\mathbf{R}^T \mathbf{R}$  are positive definite and  $\lambda_2 > \lambda_1$ , all of the terms that  $\mathbf{A}$  is composed of are positive definite and so is  $\mathbf{A}$ . Hence,  $f_2(\lambda_2) - f_2(\lambda_1) = \sum_{\ell=1}^{L+1} \alpha_\ell > 0$ . Therefore, we have shown that  $f_2(\lambda)$  is monotonic increasing.

$$\begin{aligned}
& f_2'(\lambda) \\
&= 2\lambda \beta^T (\mathbf{R}^T \mathbf{R}) (\mathbf{X}^T \hat{\mathbf{W}} \mathbf{X} + \lambda \mathbf{R}^T \mathbf{R})^{-2} (\mathbf{R}^T \mathbf{R}) \beta - \lambda^2 \text{trace} [2(\mathbf{R}^T \mathbf{R})^3 \beta \beta^T (\mathbf{X}^T \hat{\mathbf{W}} \mathbf{X} + \lambda \mathbf{R}^T \mathbf{R})^{-3}] \\
& \\
& f_1''(\lambda) + f_2''(\lambda) \\
&= \frac{d \text{trace} [-2\mathbf{R}^T \mathbf{R} (\mathbf{X}^T \hat{\mathbf{W}} \mathbf{X}) (\mathbf{X}^T \hat{\mathbf{W}} \mathbf{X} + \lambda \mathbf{R}^T \mathbf{R})^{-3}]}{d\lambda} + 2\lambda \beta^T (\mathbf{R}^T \mathbf{R}) (\mathbf{X}^T \hat{\mathbf{W}} \mathbf{X} + \lambda \mathbf{R}^T \mathbf{R})^{-2} (\mathbf{R}^T \mathbf{R}) \beta \\
&\quad + 2\lambda \frac{d[\beta^T (\mathbf{R}^T \mathbf{R}) (\mathbf{X}^T \hat{\mathbf{W}} \mathbf{X} + \lambda \mathbf{R}^T \mathbf{R})^{-2} (\mathbf{R}^T \mathbf{R}) \beta]}{d\lambda} - 2\lambda \text{trace} [2(\mathbf{R}^T \mathbf{R})^3 \beta \beta^T (\mathbf{X}^T \hat{\mathbf{W}} \mathbf{X} + \lambda \mathbf{R}^T \mathbf{R})^{-3}] \\
&\quad - \lambda^2 \frac{d[2(\mathbf{R}^T \mathbf{R})^3 \beta \beta^T (\mathbf{X}^T \hat{\mathbf{W}} \mathbf{X} + \lambda \mathbf{R}^T \mathbf{R})^{-3}]}{d\lambda} \\
&= \text{trace} [6(\mathbf{R}^T \mathbf{R})^2 (\mathbf{X}^T \hat{\mathbf{W}} \mathbf{X}) (\mathbf{X}^T \hat{\mathbf{W}} \mathbf{X} + \lambda \mathbf{R}^T \mathbf{R})^{-4}] + 2\lambda \beta^T (\mathbf{R}^T \mathbf{R}) (\mathbf{X}^T \hat{\mathbf{W}} \mathbf{X} + \lambda \mathbf{R}^T \mathbf{R})^{-2} (\mathbf{R}^T \mathbf{R}) \beta \\
&\quad + 2\lambda \text{trace} [2(\mathbf{R}^T \mathbf{R})^3 \beta \beta^T (\mathbf{X}^T \hat{\mathbf{W}} \mathbf{X} + \lambda \mathbf{R}^T \mathbf{R})^{-3}] - 2\lambda \text{trace} [2(\mathbf{R}^T \mathbf{R})^3 \beta \beta^T (\mathbf{X}^T \hat{\mathbf{W}} \mathbf{X} + \lambda \mathbf{R}^T \mathbf{R})^{-3}] \\
&\quad + \lambda^2 \text{trace} [6(\mathbf{R}^T \mathbf{R})^4 \beta \beta^T (\mathbf{X}^T \hat{\mathbf{W}} \mathbf{X} + \lambda \mathbf{R}^T \mathbf{R})^{-4}] \\
&= \text{trace} [6(\mathbf{R}^T \mathbf{R})^2 (\mathbf{X}^T \hat{\mathbf{W}} \mathbf{X}) (\mathbf{X}^T \hat{\mathbf{W}} \mathbf{X} + \lambda \mathbf{R}^T \mathbf{R})^{-4}] + 2\lambda \beta^T (\mathbf{R}^T \mathbf{R}) (\mathbf{X}^T \hat{\mathbf{W}} \mathbf{X} + \lambda \mathbf{R}^T \mathbf{R})^{-2} (\mathbf{R}^T \mathbf{R}) \beta \\
&\quad + \lambda^2 \text{trace} [6(\mathbf{R}^T \mathbf{R})^4 \beta \beta^T (\mathbf{X}^T \hat{\mathbf{W}} \mathbf{X} + \lambda \mathbf{R}^T \mathbf{R})^{-4}] > 0
\end{aligned}$$

Therefore, we have shown that  $f_1(\lambda) + f_2(\lambda)$  is convex.

## A.6 Simulation Settings and Evaluation Metrics

Table 1: Summary of the three simulation scenarios for comparing UDLM, CDLM, EB1, EB2, GRR, GADLM, BDLM, and HB in simulation study 1.

| Scenario                                                         | Working DL Function* | True Distributed Lag Coefficients                                                                                                                         |
|------------------------------------------------------------------|----------------------|-----------------------------------------------------------------------------------------------------------------------------------------------------------|
| (1) Working DL Function Completely Matches True DL Function      | Cubic                | $\beta_j = (j^3 - 17j^2 + 70j)/400$ for $j = 0, \dots, 10$                                                                                                |
| (2) Working DL Function Moderately Departs from True DL Function | Quadratic            | Slight Departure from<br>$\beta_j = (-0.7j^2 + 2.3j + 50.8)/400$ for $j = 0, \dots, 10$                                                                   |
| (3) Non-smooth True DL Function                                  | Quadratic            | Oscillating between 0.02 and 0.18                                                                                                                         |
| (4) Mixture of 5 True DL Function                                | Cubic                | (a) $\beta_j = 0$ for $j = 0, \dots, 10$<br>(b) $\beta_j = 0.014(10 - j)$ for $j = 0, \dots, 10$<br>(c) Same as (1)<br>(d) Same as (2)<br>(e) Same as (3) |

\*The working distributed lag (DL) function in CDLM for CDLM, EB1, EB2, GRR, and HB.

Table 2: Metrics used for evaluating the estimation precision in simulation study 1.

| Metric                           | Lag Effects Vector ( $\beta$ )                                                                                   | Total Effect ( $\sum_{j=0}^{10} \beta_j$ )                                                                                                                                         |
|----------------------------------|------------------------------------------------------------------------------------------------------------------|------------------------------------------------------------------------------------------------------------------------------------------------------------------------------------|
| Squared bias                     | $(\hat{\beta} - \beta)^T (\hat{\beta} - \beta)$                                                                  | $[\sum_{j=0}^{10} (\hat{\beta}_j - \beta_j)]^2$                                                                                                                                    |
| Variance                         | $\text{trace}[\frac{1}{1000} \sum_{i=1}^{1000} (\hat{\beta}_i - \hat{\beta})(\hat{\beta}_i - \hat{\beta})^T]$    | $\frac{1}{1000} \sum_{i=1}^{1000} (\sum_{j=0}^{10} \hat{\beta}_{ij} - \sum_{j=0}^{10} \hat{\beta}_j)^2$                                                                            |
| Relative Efficiency <sup>1</sup> | $\frac{\sum_{i=1}^{1000} \ \hat{\beta}_i^{UDLM} - \beta\ _2^2}{\sum_{i=1}^{1000} \ \hat{\beta}_i - \beta\ _2^2}$ | $\frac{\sum_{i=1}^{1000} (\sum_{j=0}^{10} \hat{\beta}_{ij}^{UDLM} - \sum_{j=0}^{10} \beta_j)^2}{\sum_{i=1}^{1000} (\sum_{j=0}^{10} \hat{\beta}_{ij} - \sum_{j=0}^{10} \beta_j)^2}$ |
| Distance <sup>2</sup>            | $\frac{1}{1000} \sum_{i=1}^{1000} \ \hat{\beta}_i - \beta\ _2$                                                   | -                                                                                                                                                                                  |

<sup>1</sup>Relative efficiency with respect to UDLM in terms of mean squared errors (MSE)

<sup>2</sup>Mean distance to the true coefficient vector  $\beta$

\* $\hat{\beta}_i = (\hat{\beta}_{i0}, \dots, \hat{\beta}_{i10})^T$ : the estimated lag coefficients from the  $i^{th}$  data set for a particular method

\*\* $\hat{\beta} = \frac{1}{1000} \sum_{i=1}^{1000} \hat{\beta}_i$  and  $\hat{\beta}_j = \frac{1}{1000} \sum_{i=1}^{1000} \hat{\beta}_{ij}$  for  $j = 0, \dots, 10$ .

## A.7 Quantification of the Uncertainty Ignored by Fixing Tuning Parameter GRR

Table 3: Average of the 1000 estimated variances as a percentage of the empirical variance of the 1000 estimates from 1000 repetitions for the 11 cumulative lag coefficient estimates based on GRR across the three scenarios in simulation study 1.

| Percentage | Scenario 1 | Scenario 2 | Scenario 3 |
|------------|------------|------------|------------|
| Lag 0      | 0.91       | 0.83       | 0.96       |
| Lag 1      | 0.97       | 0.88       | 0.93       |
| Lag 2      | 0.93       | 0.96       | 0.94       |
| Lag 3      | 0.92       | 0.92       | 1.02       |
| Lag 4      | 0.92       | 0.90       | 0.95       |
| Lag 5      | 0.93       | 0.99       | 0.89       |
| Lag 6      | 0.93       | 0.97       | 0.91       |
| Lag 7      | 0.95       | 0.95       | 0.93       |
| Lag 8      | 0.97       | 0.95       | 0.95       |
| Lag 9      | 0.95       | 0.95       | 0.91       |
| Lag 10     | 0.96       | 0.98       | 0.95       |



## A.8 NMMAPS Analysis

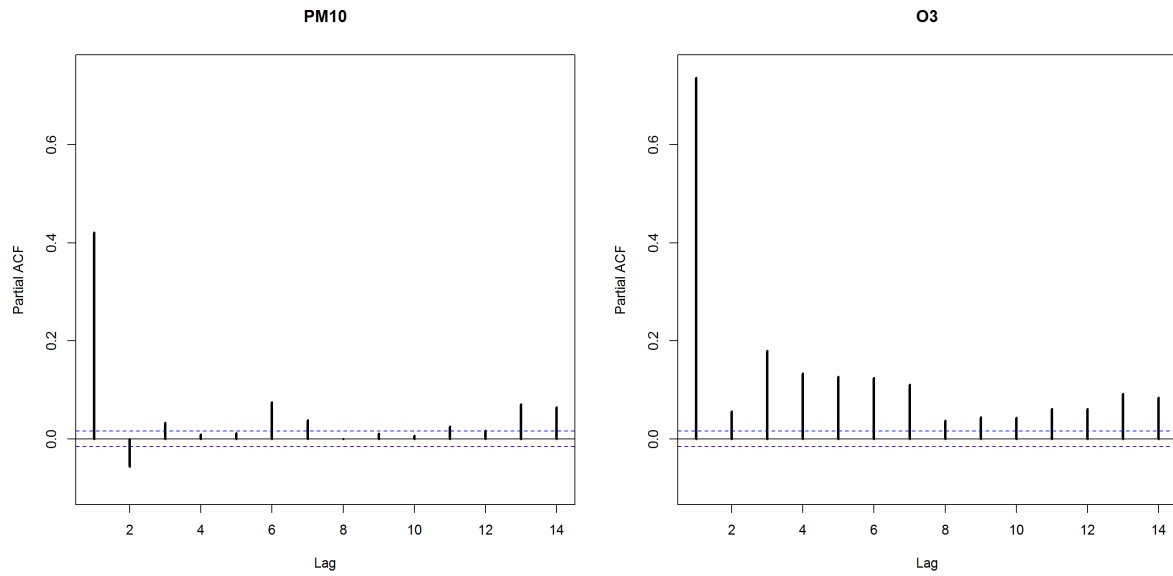

Figure 1: Partial autocorrelation function (PACF) plots for daily measurements of  $\text{PM}_{10}$  (left) and  $\text{O}_3$  (right) in Chicago, Illinois from 1987 to 2000 based on the National Morbidity, Mortality and Air Pollution Study (NMMAPS) data.

Table 4: Estimated mean and 95% confidence/credible interval of the cumulative lagged effect (% change in mortality count) up to 3, 7, and 14 days of PM<sub>10</sub> (upper) and O<sub>3</sub> (lower) on mortality with an interquartile range increase in exposure level (PM<sub>10</sub>: 21.49 $\mu$ g/m<sup>3</sup>, O<sub>3</sub>: 14.65 ppb) in Chicago, Illinois from 1987 to 2000 based on the data from the National Morbidity, Mortality, and Air Pollution Study (NMMAPS) under eight estimation methods.

| PM <sub>10</sub> | Up to Lag 3 (95% CI <sup>1</sup> ) | Up to Lag 7 (95% CI <sup>1</sup> ) | Up to Lag 14 (95% CI <sup>1</sup> ) |
|------------------|------------------------------------|------------------------------------|-------------------------------------|
| UDLM             | 0.75 (-0.01, 1.52)                 | 0.32 (-0.71, 1.36)                 | -0.75 (-2.24, 0.75)                 |
| CDLM             | 0.51 (-0.22, 1.23)                 | 0.40 (-0.61, 1.40)                 | -0.87 (-2.36, 0.62)                 |
| EB1              | 0.81 (0.07, 1.56)                  | 0.41 (-0.54, 1.37)                 | -0.71 (-1.98, 0.56)                 |
| GRR              | 0.67 (-0.06, 1.40)                 | 0.21 (-0.80, 1.22)                 | -0.74 (-2.23, 0.75)                 |
| BDLM             | 0.57 (-0.24, 1.43)                 | -0.01 (-1.23, 1.16)                | -1.05 (-2.76, 0.69)                 |
| HB               | 0.63 (0.14, 1.12)                  | 0.26 (-0.41, 0.94)                 | -0.72 (-1.60, 0.15)                 |
| HB2-GRR          | 0.48 (-0.21, 1.18)                 | 0.14 (-0.84, 1.12)                 | -0.43 (-1.91, 1.05)                 |
| HP-GRR           | 0.97 (0.27, 1.67)                  | 0.48 (-0.45, 1.41)                 | -0.57 (-1.78, 0.64)                 |
| O <sub>3</sub>   | Up to Lag 3 (95% CI <sup>1</sup> ) | Up to Lag 7 (95% CI <sup>1</sup> ) | Up to Lag 14 (95% CI <sup>1</sup> ) |
| UDLM             | 2.04 (0.98, 3.11)                  | 2.63 (1.31, 3.98)                  | 2.25 (0.53, 4.01)                   |
| CDLM             | 2.03 (1.07, 3.00)                  | 2.52 (1.28, 3.77)                  | 2.10 (0.38, 3.85)                   |
| EB1              | 2.09 (0.82, 3.39)                  | 2.59 (0.97, 4.24)                  | 2.19 (0.11, 4.32)                   |
| GRR              | 2.08 (1.10, 3.07)                  | 2.59 (1.33, 3.88)                  | 2.21 (0.48, 3.97)                   |
| BDLM             | 1.91 (0.93, 2.90)                  | 2.32 (1.11, 3.56)                  | 2.26 (0.64, 3.91)                   |
| HB               | 2.12 (1.18, 3.07)                  | 2.63 (1.41, 3.87)                  | 2.23 (0.61, 3.88)                   |
| HB2-GRR          | 1.94 (1.01, 2.89)                  | 2.30 (1.10, 3.52)                  | 2.12 (0.46, 3.80)                   |
| HP-GRR           | 1.83 (0.97, 2.70)                  | 2.18 (1.06, 3.31)                  | 2.12 (0.53, 3.73)                   |

<sup>1</sup>CI refers to confidence interval for UDLM, CDLM, EB1, GRR, and HP-GRR and refers to credible interval for BDLM, HB, and HB2-GRR.

Table 5: Estimated mean and 95% confidence/credible intervals (in parenthesis) for the lag effects (% change in mortality count) of an interquartile range increase of PM<sub>10</sub> (21.49 $\mu\text{g}/\text{m}^3$ ) on mortality in Chicago, Illinois from 1987 to 2000 based on the data from the National Morbidity, Mortality, and Air Pollution Study (NMMAPS) under eight estimation methods.

|        | UDLM                   | CDLM                    | EB1                     | GRR                     | BDLM                   | HB                      | HB2-GRR                 | HP-GRR                  |
|--------|------------------------|-------------------------|-------------------------|-------------------------|------------------------|-------------------------|-------------------------|-------------------------|
| Lag 0  | -0.15<br>(-0.61, 0.31) | -0.13<br>(-0.51, 0.26)  | -0.13<br>(-0.59, 0.34)  | -0.17<br>(-0.61, 0.27)  | -0.13<br>(-0.57, 0.31) | -0.15<br>(-0.58, 0.28)  | -0.13<br>(-0.55, 0.29)  | -0.15<br>(-0.55, 0.25)  |
| Lag 1  | 0.04<br>(-0.40, 0.48)  | 0.15<br>(-0.06, 0.35)   | 0.13<br>(-0.18, 0.43)   | 0.03<br>(-0.26, 0.33)   | 0.05<br>(-0.37, 0.46)  | -0.02<br>(-0.34, 0.31)  | 0.10<br>(-0.17, 0.37)   | 0.04<br>(-0.23, 0.31)   |
| Lag 2  | 0.22<br>(-0.22, 0.65)  | 0.25<br>(0.06, 0.44)    | 0.25<br>(-0.23, 0.73)   | 0.37<br>(0.14, 0.60)    | 0.21<br>(-0.19, 0.60)  | 0.37<br>(0.11, 0.63)    | 0.27<br>(0.05, 0.48)    | 0.33<br>(0.12, 0.55)    |
| Lag 3  | 0.65<br>(0.22, 1.08)   | 0.23<br>(0.05, 0.42)    | 0.56<br>(0.36, 0.77)    | 0.44<br>(0.22, 0.66)    | 0.54<br>(0.16, 0.92)   | 0.48<br>(0.21, 0.75)    | 0.25<br>(0.05, 0.45)    | 0.37<br>(0.18, 0.57)    |
| Lag 4  | 0.22<br>(-0.20, 0.64)  | 0.15<br>(-0.01, 0.31)   | 0.15<br>(-0.17, 0.48)   | 0.19<br>(-0.01, 0.40)   | 0.13<br>(-0.22, 0.49)  | 0.21<br>(-0.02, 0.43)   | 0.07<br>(-0.10, 0.24)   | 0.12<br>(-0.06, 0.29)   |
| Lag 5  | -0.27<br>(-0.69, 0.15) | 0.03<br>(-0.11, 0.17)   | -0.17<br>(-0.32, -0.01) | -0.13<br>(-0.32, 0.05)  | -0.23<br>(-0.55, 0.08) | -0.17<br>(-0.39, 0.06)  | -0.11<br>(-0.26, 0.04)  | -0.15<br>(-0.31, 0.00)  |
| Lag 6  | -0.41<br>(-0.83, 0.02) | -0.09<br>(-0.24, 0.05)  | -0.31<br>(-0.46, -0.15) | -0.29<br>(-0.47, -0.10) | -0.27<br>(-0.56, 0.03) | -0.31<br>(-0.52, -0.10) | -0.17<br>(-0.32, -0.02) | -0.23<br>(-0.37, -0.10) |
| Lag 7  | 0.03<br>(-0.40, 0.45)  | -0.19<br>(-0.34, -0.05) | -0.08<br>(-0.24, 0.07)  | -0.23<br>(-0.42, -0.05) | -0.11<br>(-0.36, 0.15) | -0.21<br>(-0.42, 0.00)  | -0.14<br>(-0.28, 0.00)  | -0.19<br>(-0.32, -0.07) |
| Lag 8  | -0.25<br>(-0.70, 0.20) | -0.26<br>(-0.40, -0.11) | -0.26<br>(-0.71, 0.20)  | -0.12<br>(-0.31, 0.06)  | -0.15<br>(-0.38, 0.07) | -0.10<br>(-0.31, 0.11)  | -0.10<br>(-0.22, 0.02)  | -0.16<br>(-0.27, -0.04) |
| Lag 9  | -0.03<br>(-0.48, 0.43) | -0.28<br>(-0.41, -0.14) | -0.14<br>(-0.28, 0.00)  | -0.08<br>(-0.27, 0.10)  | -0.13<br>(-0.33, 0.07) | -0.09<br>(-0.32, 0.13)  | -0.09<br>(-0.20, 0.02)  | -0.14<br>(-0.25, -0.04) |
| Lag 10 | -0.27<br>(-0.73, 0.18) | -0.25<br>(-0.40, -0.11) | -0.25<br>(-0.75, 0.24)  | -0.14<br>(-0.34, 0.06)  | -0.14<br>(-0.32, 0.04) | -0.15<br>(-0.38, 0.07)  | -0.09<br>(-0.20, 0.02)  | -0.14<br>(-0.23, -0.04) |
| Lag 11 | -0.12<br>(-0.58, 0.33) | -0.20<br>(-0.37, -0.04) | -0.19<br>(-0.55, 0.17)  | -0.24<br>(-0.44, -0.04) | -0.13<br>(-0.29, 0.04) | -0.24<br>(-0.48, 0.01)  | -0.08<br>(-0.18, 0.02)  | -0.13<br>(-0.21, -0.04) |
| Lag 12 | -0.33<br>(-0.79, 0.12) | -0.13<br>(-0.30, 0.04)  | -0.22<br>(-0.39, -0.04) | -0.31<br>(-0.52, -0.10) | -0.12<br>(-0.28, 0.03) | -0.31<br>(-0.55, -0.06) | -0.07<br>(-0.17, 0.02)  | -0.12<br>(-0.19, -0.04) |
| Lag 13 | -0.25<br>(-0.70, 0.21) | -0.08<br>(-0.25, 0.09)  | -0.14<br>(-0.33, 0.06)  | -0.23<br>(-0.50, 0.04)  | -0.10<br>(-0.24, 0.03) | -0.24<br>(-0.55, 0.07)  | -0.07<br>(-0.16, 0.02)  | -0.10<br>(-0.17, -0.03) |
| Lag 14 | 0.18<br>(-0.24, 0.60)  | -0.07<br>(-0.38, 0.25)  | 0.07<br>(-0.27, 0.42)   | 0.18<br>(-0.21, 0.56)   | -0.08<br>(-0.21, 0.06) | 0.18<br>(-0.22, 0.58)   | -0.06<br>(-0.14, 0.02)  | -0.09<br>(-0.15, -0.03) |

Table 6: Estimated mean and 95% confidence/credible intervals (in parenthesis) for the lag effects (% change in mortality count) of an interquartile range increase of O<sub>3</sub> (14.65 ppb) on mortality in Chicago, Illinois from 1987 to 2000 based on the data from the National Morbidity, Mortality, and Air Pollution Study (NMMAPS) under eight estimation methods.

|        | UDLM                   | CDLM                   | EB1                     | GRR                     | BDLM                   | HB                     | HB2-GRR                | HP-GRR                 |
|--------|------------------------|------------------------|-------------------------|-------------------------|------------------------|------------------------|------------------------|------------------------|
| Lag 0  | 0.50<br>(-0.21, 1.20)  | 0.33<br>(-0.19, 0.85)  | 0.36<br>(-0.26, 0.98)   | 0.32<br>(-0.33, 0.98)   | 0.45<br>(-0.22, 1.11)  | 0.37<br>(-0.31, 1.00)  | 0.32<br>(-0.29, 0.94)  | 0.30<br>(-0.26, 0.85)  |
| Lag 1  | 0.12<br>(-0.59, 0.83)  | 0.57<br>(0.29, 0.85)   | 0.29<br>(-0.08, 0.67)   | 0.53<br>(0.06, 1.00)    | 0.18<br>(-0.47, 0.83)  | 0.50<br>(0.00, 1.09)   | 0.46<br>(0.01, 0.91)   | 0.48<br>(0.08, 0.88)   |
| Lag 2  | 1.20<br>(0.49, 1.91)   | 0.61<br>(0.35, 0.86)   | 1.04<br>(0.70, 1.38)    | 0.68<br>(0.34, 1.01)    | 1.00<br>(0.38, 1.62)   | 0.69<br>(0.26, 1.00)   | 0.63<br>(0.31, 0.95)   | 0.59<br>(0.30, 0.89)   |
| Lag 3  | 0.22<br>(-0.48, 0.92)  | 0.51<br>(0.27, 0.75)   | 0.39<br>(0.09, 0.70)    | 0.54<br>(0.21, 0.86)    | 0.27<br>(-0.29, 0.84)  | 0.54<br>(0.17, 0.90)   | 0.52<br>(0.22, 0.82)   | 0.45<br>(0.18, 0.72)   |
| Lag 4  | 0.36<br>(-0.34, 1.06)  | 0.35<br>(0.15, 0.55)   | 0.35<br>(-0.39, 1.10)   | 0.31<br>(0.01, 0.60)    | 0.25<br>(-0.24, 0.75)  | 0.30<br>(0.01, 0.70)   | 0.27<br>(0.01, 0.54)   | 0.24<br>(0.02, 0.46)   |
| Lag 5  | 0.20<br>(-0.49, 0.90)  | 0.18<br>(0.00, 0.36)   | 0.18<br>(-0.62, 0.98)   | 0.18<br>(-0.11, 0.46)   | 0.13<br>(-0.30, 0.56)  | 0.16<br>(-0.14, 0.53)  | 0.09<br>(-0.16, 0.33)  | 0.11<br>(-0.08, 0.29)  |
| Lag 6  | 0.02<br>(-0.68, 0.71)  | 0.03<br>(-0.16, 0.22)  | 0.03<br>(-0.79, 0.85)   | 0.10<br>(-0.19, 0.38)   | 0.03<br>(-0.34, 0.40)  | 0.10<br>(-0.28, 0.37)  | 0.01<br>(-0.22, 0.24)  | 0.02<br>(-0.14, 0.19)  |
| Lag 7  | 0.01<br>(-0.68, 0.70)  | -0.08<br>(-0.27, 0.12) | -0.07<br>(-0.74, 0.60)  | -0.07<br>(-0.35, 0.21)  | 0.00<br>(-0.33, 0.33)  | -0.05<br>(-0.45, 0.21) | -0.02<br>(-0.23, 0.19) | -0.03<br>(-0.18, 0.12) |
| Lag 8  | -0.08<br>(-0.77, 0.62) | -0.12<br>(-0.31, 0.07) | -0.12<br>(-0.82, 0.59)  | -0.27<br>(-0.55, 0.01)  | -0.04<br>(-0.35, 0.27) | -0.27<br>(-0.55, 0.09) | -0.06<br>(-0.26, 0.15) | -0.04<br>(-0.17, 0.10) |
| Lag 9  | -0.57<br>(-1.26, 0.12) | -0.11<br>(-0.29, 0.07) | -0.40<br>(-0.60, -0.21) | -0.22<br>(-0.51, 0.06)  | -0.07<br>(-0.40, 0.26) | -0.26<br>(-0.46, 0.20) | -0.07<br>(-0.26, 0.11) | -0.02<br>(-0.13, 0.10) |
| Lag 10 | 0.18<br>(-0.51, 0.88)  | -0.05<br>(-0.24, 0.14) | 0.02<br>(-0.26, 0.29)   | 0.12<br>(-0.17, 0.41)   | 0.03<br>(-0.20, 0.26)  | 0.12<br>(-0.23, 0.46)  | -0.02<br>(-0.19, 0.14) | 0.00<br>(-0.11, 0.11)  |
| Lag 11 | 0.57<br>(-0.13, 1.27)  | 0.02<br>(-0.21, 0.24)  | 0.41<br>(0.15, 0.67)    | 0.32<br>(0.01, 0.64)    | 0.05<br>(-0.20, 0.30)  | 0.36<br>(-0.15, 0.59)  | 0.02<br>(-0.14, 0.17)  | 0.00<br>(-0.09, 0.10)  |
| Lag 12 | -0.19<br>(-0.88, 0.50) | 0.05<br>(-0.18, 0.28)  | -0.03<br>(-0.36, 0.31)  | -0.03<br>(-0.34, 0.28)  | -0.01<br>(-0.20, 0.18) | -0.02<br>(-0.38, 0.31) | -0.01<br>(-0.15, 0.14) | 0.00<br>(-0.09, 0.08)  |
| Lag 13 | -0.55<br>(-1.23, 0.14) | 0.00<br>(-0.22, 0.23)  | -0.39<br>(-0.64, -0.14) | -0.54<br>(-0.97, -0.10) | -0.03<br>(-0.22, 0.17) | -0.57<br>(-0.89, 0.14) | -0.03<br>(-0.18, 0.12) | 0.00<br>(-0.08, 0.08)  |
| Lag 14 | 0.28<br>(-0.34, 0.90)  | -0.20<br>(-0.64, 0.25) | 0.13<br>(-0.36, 0.63)   | 0.24<br>(-0.33, 0.81)   | 0.01<br>(-0.14, 0.15)  | 0.26<br>(-0.43, 0.73)  | -0.01<br>(-0.14, 0.12) | 0.00<br>(-0.07, 0.07)  |

Table 7: Estimated mean and 95% confidence intervals (in parenthesis) for the cumulative lag effect (% change in mortality count) of an interquartile range increase of PM<sub>10</sub> (21.49 $\mu\text{g}/\text{m}^3$ ) across lags on mortality in Chicago, Illinois from 1987 to 2000 based on the data from the National Morbidity, Mortality, and Air Pollution Study (NMMAPS) under eight estimation methods.

|        | UDLM                   | CDLM                   | EB1                    | GRR                    | BDLM                   | HB                      | HB2-GRR                | HP-GRR                 |
|--------|------------------------|------------------------|------------------------|------------------------|------------------------|-------------------------|------------------------|------------------------|
| Lag 0  | -0.15<br>(-0.61, 0.31) | -0.13<br>(-0.51, 0.26) | -0.13<br>(-0.51, 0.25) | -0.17<br>(-0.61, 0.27) | -0.18<br>(-0.66, 0.24) | -0.25<br>(-0.59, 0.08)  | -0.13<br>(-0.55, 0.29) | -0.15<br>(-0.53, 0.23) |
| Lag 1  | -0.12<br>(-0.71, 0.48) | 0.02<br>(-0.53, 0.58)  | 0.00<br>(-0.42, 0.42)  | -0.14<br>(-0.70, 0.42) | -0.15<br>(-0.78, 0.41) | -0.09<br>(-0.48, 0.31)  | -0.03<br>(-0.56, 0.51) | 0.01<br>(-0.40, 0.43)  |
| Lag 2  | 0.10<br>(-0.58, 0.78)  | 0.27<br>(-0.37, 0.92)  | 0.25<br>(-0.39, 0.88)  | 0.23<br>(-0.42, 0.89)  | 0.17<br>(-0.60, 0.91)  | 0.29<br>(-0.16, 0.73)   | 0.24<br>(-0.38, 0.86)  | 0.36<br>(-0.25, 0.96)  |
| Lag 3  | 0.75<br>(-0.01, 1.52)  | 0.51<br>(-0.22, 1.23)  | 0.81<br>(0.07, 1.56)   | 0.67<br>(-0.06, 1.40)  | 0.57<br>(-0.24, 1.43)  | 0.63<br>(0.14, 1.12)    | 0.48<br>(-0.21, 1.18)  | 0.97<br>(0.27, 1.67)   |
| Lag 4  | 0.97<br>(0.13, 1.81)   | 0.65<br>(-0.14, 1.45)  | 0.97<br>(0.10, 1.83)   | 0.86<br>(0.06, 1.67)   | 0.71<br>(-0.18, 1.69)  | 0.78<br>(0.23, 1.32)    | 0.55<br>(-0.22, 1.32)  | 1.12<br>(0.30, 1.94)   |
| Lag 5  | 0.70<br>(-0.20, 1.61)  | 0.68<br>(-0.19, 1.55)  | 0.80<br>(-0.11, 1.71)  | 0.73<br>(-0.15, 1.61)  | 0.55<br>(-0.45, 1.59)  | 0.70<br>(0.11, 1.30)    | 0.44<br>(-0.39, 1.28)  | 0.94<br>(0.06, 1.82)   |
| Lag 6  | 0.30<br>(-0.67, 1.27)  | 0.59<br>(-0.35, 1.52)  | 0.50<br>(-0.44, 1.44)  | 0.44<br>(-0.50, 1.39)  | 0.24<br>(-0.84, 1.35)  | 0.49<br>(-0.15, 1.13)   | 0.28<br>(-0.63, 1.18)  | 0.60<br>(-0.31, 1.51)  |
| Lag 7  | 0.32<br>(-0.71, 1.36)  | 0.40<br>(-0.61, 1.40)  | 0.41<br>(-0.54, 1.37)  | 0.21<br>(-0.80, 1.22)  | -0.01<br>(-1.23, 1.16) | 0.26<br>(-0.41, 0.94)   | 0.14<br>(-0.84, 1.12)  | 0.48<br>(-0.45, 1.41)  |
| Lag 8  | 0.07<br>(-1.03, 1.18)  | 0.14<br>(-0.93, 1.21)  | 0.16<br>(-0.93, 1.25)  | 0.09<br>(-0.99, 1.16)  | -0.15<br>(-1.39, 1.13) | 0.09<br>(-0.61, 0.79)   | 0.04<br>(-1.02, 1.09)  | 0.24<br>(-0.78, 1.26)  |
| Lag 9  | 0.05<br>(-1.12, 1.22)  | -0.13<br>(-1.27, 1.01) | 0.02<br>(-1.10, 1.13)  | 0.00<br>(-1.14, 1.15)  | -0.27<br>(-1.55, 1.13) | -0.03<br>(-0.76, 0.70)  | -0.06<br>(-1.19, 1.07) | 0.12<br>(-0.92, 1.16)  |
| Lag 10 | -0.22<br>(-1.46, 1.01) | -0.39<br>(-1.59, 0.82) | -0.24<br>(-1.54, 1.07) | -0.14<br>(-1.35, 1.08) | -0.40<br>(-1.79, 1.05) | -0.16<br>(-0.92, 0.60)  | -0.15<br>(-1.35, 1.06) | -0.05<br>(-1.15, 1.05) |
| Lag 11 | -0.35<br>(-1.65, 0.95) | -0.59<br>(-1.86, 0.68) | -0.43<br>(-1.70, 0.84) | -0.38<br>(-1.66, 0.91) | -0.64<br>(-2.09, 0.91) | -0.37<br>(-1.17, 0.42)  | -0.23<br>(-1.51, 1.05) | -0.19<br>(-1.31, 0.92) |
| Lag 12 | -0.68<br>(-2.05, 0.68) | -0.72<br>(-2.06, 0.62) | -0.65<br>(-1.96, 0.66) | -0.69<br>(-2.03, 0.66) | -0.97<br>(-2.51, 0.65) | -0.67<br>(-1.49, 0.16)  | -0.30<br>(-1.65, 1.05) | -0.35<br>(-1.49, 0.79) |
| Lag 13 | -0.93<br>(-2.35, 0.49) | -0.80<br>(-2.21, 0.61) | -0.78<br>(-2.10, 0.53) | -0.92<br>(-2.33, 0.50) | -1.23<br>(-2.85, 0.45) | -0.91<br>(-1.77, -0.04) | -0.37<br>(-1.78, 1.05) | -0.48<br>(-1.66, 0.69) |
| Lag 14 | -0.75<br>(-2.24, 0.75) | -0.87<br>(-2.36, 0.62) | -0.71<br>(-1.98, 0.56) | -0.74<br>(-2.23, 0.75) | -1.05<br>(-2.76, 0.69) | -0.72<br>(-1.60, 0.15)  | -0.43<br>(-1.91, 1.05) | -0.57<br>(-1.78, 0.64) |

Table 8: Estimated mean and 95% confidence intervals (in parenthesis) for the cumulative lag effect (% change in mortality count) of an interquartile range increase of O<sub>3</sub> (14.65 ppb) across lags on mortality in Chicago, Illinois from 1987 to 2000 based on the data from the National Morbidity, Mortality, and Air Pollution Study (NMMAPS) under eight estimation methods.

|        | UDLM                  | CDLM                  | EB1                   | GRR                   | BDLM                  | HB                    | HB2-GRR               | HP-GRR                |
|--------|-----------------------|-----------------------|-----------------------|-----------------------|-----------------------|-----------------------|-----------------------|-----------------------|
| Lag 0  | 0.50<br>(-0.21, 1.20) | 0.33<br>(-0.19, 0.85) | 0.36<br>(-0.26, 0.98) | 0.32<br>(-0.33, 0.98) | 0.45<br>(-0.22, 1.11) | 0.37<br>(-0.28, 1.03) | 0.32<br>(-0.29, 0.94) | 0.30<br>(-0.26, 0.85) |
| Lag 1  | 0.61<br>(-0.19, 1.42) | 0.90<br>(0.16, 1.64)  | 0.65<br>(-0.27, 1.58) | 0.85<br>(0.10, 1.61)  | 0.63<br>(-0.15, 1.40) | 0.87<br>(0.11, 1.64)  | 0.78<br>(0.06, 1.51)  | 0.78<br>(0.10, 1.45)  |
| Lag 2  | 1.82<br>(0.87, 2.77)  | 1.51<br>(0.65, 2.38)  | 1.70<br>(0.59, 2.82)  | 1.53<br>(0.66, 2.41)  | 1.63<br>(0.74, 2.53)  | 1.57<br>(0.73, 2.42)  | 1.42<br>(0.58, 2.27)  | 1.38<br>(0.60, 2.16)  |
| Lag 3  | 2.04<br>(0.98, 3.11)  | 2.03<br>(1.07, 3.00)  | 2.09<br>(0.82, 3.39)  | 2.08<br>(1.10, 3.07)  | 1.91<br>(0.93, 2.90)  | 2.12<br>(1.18, 3.07)  | 1.94<br>(1.01, 2.89)  | 1.83<br>(0.97, 2.70)  |
| Lag 4  | 2.40<br>(1.27, 3.55)  | 2.39<br>(1.34, 3.44)  | 2.45<br>(0.86, 4.07)  | 2.39<br>(1.31, 3.48)  | 2.17<br>(1.12, 3.23)  | 2.42<br>(1.39, 3.47)  | 2.22<br>(1.19, 3.26)  | 2.08<br>(1.14, 3.02)  |
| Lag 5  | 2.61<br>(1.41, 3.83)  | 2.57<br>(1.45, 3.69)  | 2.63<br>(1.13, 4.16)  | 2.57<br>(1.42, 3.73)  | 2.29<br>(1.18, 3.42)  | 2.59<br>(1.47, 3.71)  | 2.31<br>(1.22, 3.41)  | 2.18<br>(1.19, 3.19)  |
| Lag 6  | 2.63<br>(1.36, 3.91)  | 2.59<br>(1.42, 3.78)  | 2.66<br>(1.01, 4.34)  | 2.67<br>(1.46, 3.89)  | 2.32<br>(1.16, 3.50)  | 2.69<br>(1.51, 3.88)  | 2.32<br>(1.17, 3.48)  | 2.21<br>(1.15, 3.27)  |
| Lag 7  | 2.63<br>(1.31, 3.98)  | 2.52<br>(1.28, 3.77)  | 2.59<br>(0.97, 4.24)  | 2.59<br>(1.33, 3.88)  | 2.32<br>(1.11, 3.56)  | 2.63<br>(1.41, 3.87)  | 2.30<br>(1.10, 3.52)  | 2.18<br>(1.06, 3.31)  |
| Lag 8  | 2.55<br>(1.18, 3.95)  | 2.39<br>(1.08, 3.72)  | 2.47<br>(0.84, 4.11)  | 2.32<br>(1.00, 3.66)  | 2.28<br>(1.02, 3.57)  | 2.35<br>(1.07, 3.65)  | 2.25<br>(0.99, 3.52)  | 2.14<br>(0.95, 3.34)  |
| Lag 9  | 1.97<br>(0.54, 3.41)  | 2.28<br>(0.91, 3.68)  | 2.05<br>(0.38, 3.75)  | 2.09<br>(0.71, 3.49)  | 2.21<br>(0.87, 3.57)  | 2.09<br>(0.74, 3.45)  | 2.17<br>(0.85, 3.51)  | 2.12<br>(0.86, 3.40)  |
| Lag 10 | 2.15<br>(0.66, 3.67)  | 2.23<br>(0.80, 3.69)  | 2.07<br>(0.32, 3.85)  | 2.22<br>(0.77, 3.68)  | 2.24<br>(0.85, 3.66)  | 2.21<br>(0.80, 3.64)  | 2.15<br>(0.77, 3.55)  | 2.13<br>(0.79, 3.48)  |
| Lag 11 | 2.73<br>(1.17, 4.32)  | 2.25<br>(0.75, 3.77)  | 2.48<br>(0.63, 4.37)  | 2.55<br>(1.02, 4.09)  | 2.29<br>(0.84, 3.76)  | 2.57<br>(1.10, 4.06)  | 2.17<br>(0.71, 3.64)  | 2.13<br>(0.73, 3.55)  |
| Lag 12 | 2.53<br>(0.91, 4.18)  | 2.30<br>(0.73, 3.89)  | 2.46<br>(0.45, 4.50)  | 2.52<br>(0.93, 4.13)  | 2.28<br>(0.77, 3.81)  | 2.55<br>(1.04, 4.09)  | 2.16<br>(0.64, 3.70)  | 2.13<br>(0.66, 3.62)  |
| Lag 13 | 1.97<br>(0.30, 3.67)  | 2.31<br>(0.67, 3.97)  | 2.06<br>(-0.02, 4.18) | 1.97<br>(0.31, 3.65)  | 2.26<br>(0.69, 3.85)  | 1.96<br>(0.39, 3.57)  | 2.13<br>(0.54, 3.74)  | 2.12<br>(0.59, 3.68)  |
| Lag 14 | 2.25<br>(0.53, 4.01)  | 2.10<br>(0.38, 3.85)  | 2.19<br>(0.11, 4.32)  | 2.21<br>(0.48, 3.97)  | 2.26<br>(0.64, 3.91)  | 2.23<br>(0.61, 3.88)  | 2.12<br>(0.46, 3.80)  | 2.12<br>(0.53, 3.73)  |

## A.9 Computation Times

Table 9: Computation times of applying eight estimation methods to National Morbidity, Mortality, and Air Pollution Study (NMMAPS) data on an Intel i7-2600 CPU with a single 3.4GHz core.

| Methods                | Time         |
|------------------------|--------------|
| UDLM                   | 1.7 seconds  |
| CDLM                   | 1.6 seconds  |
| EB1                    | 5.8 seconds  |
| GRR <sup>1</sup>       | 63.7 seconds |
| BDLM <sup>2</sup>      | 5.4 seconds  |
| HB <sup>3</sup>        | 1.1 hours    |
| HB2-GRR <sup>1,4</sup> | 13.1 hours   |
| HP-GRR <sup>1,4</sup>  | 14.1 hours   |

<sup>1</sup> Tuning parameter is chosen from a grid of 100 equally-spaced values

<sup>2</sup> Asymptotic normality of the Poisson likelihood is applied

<sup>3</sup> Gibbs sampler is based on 10000 iterations

<sup>4</sup> Standard error estimates are based on 1000 bootstrap samples
